# Supplementary material
Source: PubMed Central journal article supplement (PMC4815498)

A

Principal component map

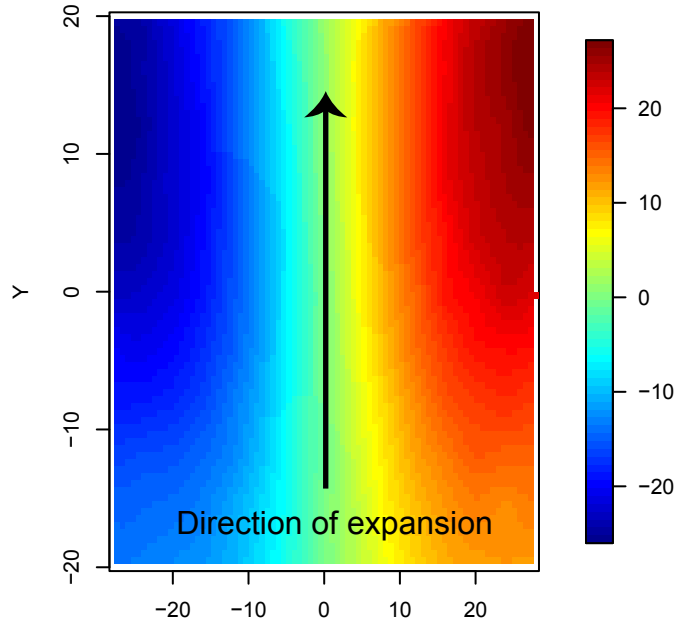

B

Environmental gradient

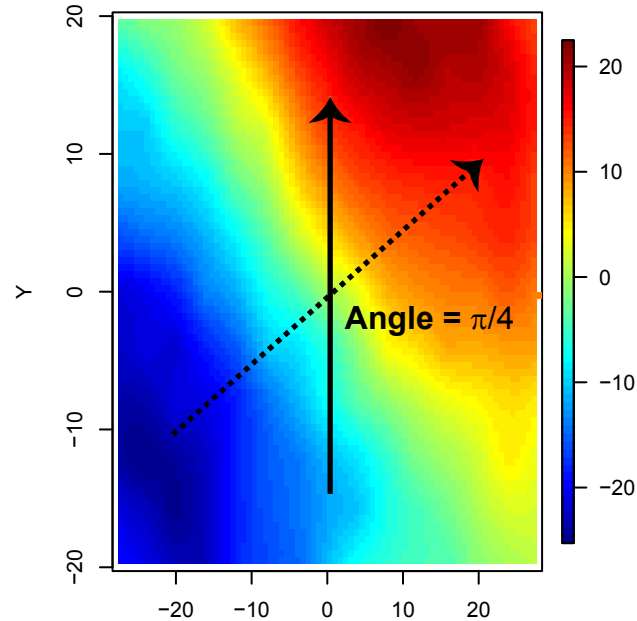

C

Environmental gradient

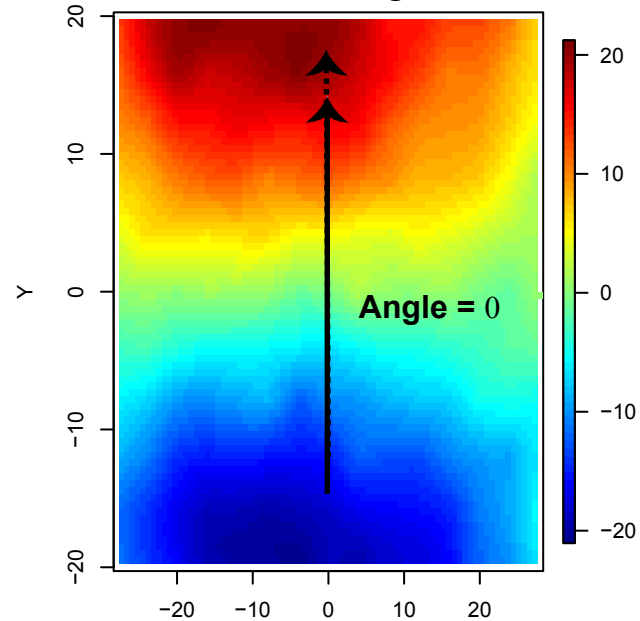

Supplement: hdy20157x1.pdf [file hdy20157x1.pdf]

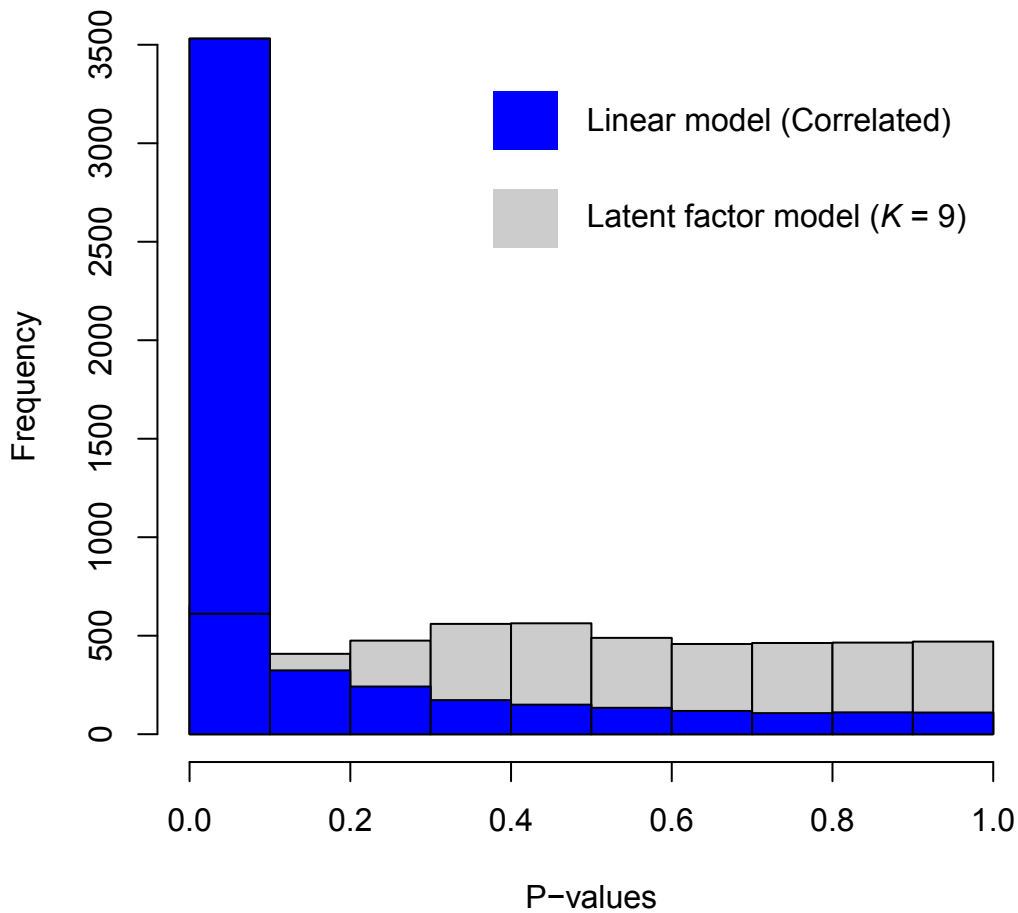

Supplement: hdy20157x2.pdf [file hdy20157x2.pdf]
